# Supplementary material
Source: PubMed Central journal article supplement (PMC5722710)
Supplement: NIHMS883321-supplement-supplement_1.pdf [file NIHMS883321-supplement-supplement_1.pdf]

**Supplemental Table. Characteristics of Participants With and Without Irritable Bowel Syndrome**

|                                                          | IBS             | No IBS          |
|----------------------------------------------------------|-----------------|-----------------|
| n (%) or mean $\pm$ standard deviation                   | n = 51          | n=397           |
| <b>Age</b>                                               |                 |                 |
| ≤49 y                                                    | 5(10)           | 28 (7)          |
| 50-59                                                    | 39 (76)         | 291 (73)        |
| 60-69                                                    | 4 (8)           | 67 (17)         |
| 70-79                                                    | 2 (4)           | 11 (3)          |
| ≥80                                                      | 1 (2)           | 0 (0)           |
| <b>Sex</b>                                               |                 |                 |
| Male                                                     | 16 (31)         | 172 (43)        |
| Female                                                   | 35 (69)         | 225 (57)        |
| <b>Race</b>                                              |                 |                 |
| White                                                    | 46 (90)         | 320 (81)        |
| Black                                                    | 5 (10)          | 69 (17)         |
| Other                                                    | 0 (0)           | 7 (2)           |
| <b>Smoking status</b>                                    |                 |                 |
| Never                                                    | 31 (61)         | 228 (58)        |
| Former                                                   | 8 (16)          | 123 (31)        |
| Current                                                  | 12 (24)         | 44 (11)         |
| <b>Body mass index, kg/m<sup>2</sup></b>                 |                 |                 |
| Underweight (<18.5)                                      | 1 (2)           | 8 (2)           |
| Normal (18.5-25)                                         | 9 (18)          | 135 (34)        |
| Overweight (25-30)                                       | 17 (35)         | 123 (31)        |
| Obese (>30)                                              | 22 (45)         | 130 (33)        |
| <b>Daily dietary intake</b>                              |                 |                 |
| Total energy intake, kilocalories                        | 2,140 $\pm$ 728 | 2,061 $\pm$ 789 |
| Total fiber, grams                                       | 19.3 $\pm$ 8.2  | 20.6 $\pm$ 9.7  |
| <b>Nonsteroidal anti-inflammatory drug use per month</b> |                 |                 |
| Never                                                    | 19 (37)         | 228 (58)        |
| 1-4 times                                                | 15 (29)         | 83 (21)         |
| >4 times                                                 | 17 (33)         | 81 (21)         |
| <b>Aspirin use per month</b>                             |                 |                 |
| Never                                                    | 30 (59)         | 234 (59)        |
| 1-4 times                                                | 18 (35)         | 130 (33)        |
| >4 times                                                 | 3 (6)           | 30 (8)          |
| <b>Daily alcohol use, drinks</b>                         | 0.61 $\pm$ 1.14 | 0.82 $\pm$ 1.59 |
| <b>Number of diverticula</b>                             |                 |                 |
| 0 diverticula                                            | 36 (71)         | 223 (56)        |

|                                |        |          |
|--------------------------------|--------|----------|
| 1-3 diverticula                | 3 (6)  | 43 (11)  |
| 4-10 diverticula               | 6 (12) | 67 (17)  |
| ≥10 diverticula                | 6 (12) | 64 (16)  |
| <b>Location of diverticula</b> |        |          |
| Proximal diverticula only      | 1 (7)  | 11 (6)   |
| Distal diverticula only        | 7 (47) | 111 (66) |
| Pan diverticula                | 7 (47) | 47 (28)  |

**Supplemental Table. Cytokine Expression Levels and Immunohistochemistry by Case Control Status**

|                                                | Number | 25%  | 50%  | 75%  |
|------------------------------------------------|--------|------|------|------|
| <b>Cytokine expression</b>                     |        |      |      |      |
| IL-6                                           |        |      |      |      |
| Cases                                          | 227    | 0.43 | 0.79 | 1.66 |
| Controls                                       | 321    | 0.51 | 1.10 | 2.26 |
| IL-10                                          |        |      |      |      |
| Cases                                          | 229    | 0.13 | 0.25 | 0.42 |
| Controls                                       | 324    | 0.16 | 0.27 | 0.52 |
| TNF- $\alpha$                                  |        |      |      |      |
| Cases                                          | 229    | 1.02 | 2.15 | 3.46 |
| Controls                                       | 323    | 1.31 | 2.18 | 3.55 |
| <b>Immunohistochemistry - H score</b>          |        |      |      |      |
| CD4                                            |        |      |      |      |
| Cases                                          | 239    | 85   | 103  | 121  |
| Controls                                       | 334    | 83   | 100  | 121  |
| CD8                                            |        |      |      |      |
| Cases                                          | 238    | 22   | 31   | 40   |
| Controls                                       | 333    | 23   | 32   | 43   |
| CD57                                           |        |      |      |      |
| Cases                                          | 237    | 10   | 15   | 21   |
| Controls                                       | 334    | 11   | 16   | 21   |
| Mast cell tryptase                             |        |      |      |      |
| Cases                                          | 241    | 35   | 47   | 65   |
| Controls                                       | 334    | 25   | 48   | 62   |
| <b>Immunohistochemistry - % positive cells</b> |        |      |      |      |
| CD4                                            |        |      |      |      |
| Cases                                          | 239    | 54.5 | 63.4 | 70.2 |
| Controls                                       | 334    | 53.3 | 61.0 | 69.9 |
| CD8                                            |        |      |      |      |
| Cases                                          | 238    | 15.7 | 21.2 | 26.2 |
| Controls                                       | 333    | 15.5 | 20.4 | 27.5 |
| CD57                                           |        |      |      |      |
| Cases                                          | 237    | 7.9  | 11.7 | 16.9 |
| Controls                                       | 334    | 8.8  | 12.7 | 17.8 |
| Mast cell tryptase                             |        |      |      |      |
| Cases                                          | 241    | 22.4 | 32.0 | 43.1 |
| Controls                                       | 334    | 22.0 | 31.1 | 41.5 |

|                                                                                            |     |     |     |     |
|--------------------------------------------------------------------------------------------|-----|-----|-----|-----|
| CD4/CD8 ratio                                                                              |     |     |     |     |
| Cases                                                                                      | 237 | 2.3 | 3.0 | 3.8 |
| Controls                                                                                   | 331 | 2.2 | 2.8 | 3.9 |
| Cases are participants with any diverticula, controls are participants without diverticula |     |     |     |     |
